# Supplementary material for: Application of Objective Structured Clinical Examinations (OSCE) for The Evaluation of Kampo Medicine Training
Source: Research Square preprint supplement (doi:10.21203/rs.3.rs-855872/v1), 2021-09-23
Supplement: Supplementary file 1 [file 4abcc2435a655f3aaa2743dc.docx]

**Characteristics of the participants**

| No. | Gender | Qualification/status |
| --- | --- | --- |
| 1 | Male | First-year medical student |
| 2 | Male | Third-year dental student |
| 3 | Female | Fourth-year dental student |
| 4 | Female | Fifth-year medical student |
| 5 | Male | Dentist |
| 6 | Male | Medical doctor |
| 7 | Male | Resident |
| 8 | Male | Resident |
| 9 | Male | Medical doctor  (8 years working in Kampo medicine) |
| 10 | Male | Dentist  (8 years working in Kampo medicine) |
| 11 | Male | Dentist  (8 years working in Kampo medicine) |
