# Supplementary material for: Application of Objective Structured Clinical Examinations (OSCE) for The Evaluation of Kampo Medicine Training
Source: Research Square preprint supplement (doi:10.21203/rs.3.rs-855872/v1), 2021-09-23
Supplement: Supplementary file 1 [file 290131836ea600e719727cff.docx]

|  | **Evaluation chart** |  | |  | | | |  |  |
| --- | --- | --- | --- | --- | --- | --- | --- | --- | --- |
|  |  |  | **Examinee's number:** | |  |  |  | |  |
|  |  |  | **Evaluator's name:** | |  |  |  | |  |
|  |  |  |  | |  |  |  | |  |
| No |  |  |  | | **He/she asked** | **He/She didn't ask** |  | | **CVI** |
| 1 | **History taking** | Main complaint | Onset | | □ | □ |  | | 1 |
| 2 |  |  | Progress | | □ | □ |  | | 1 |
| 3 |  |  | Quality | | □ | □ |  | | 1 |
| 4 |  |  | Location | | □ | □ |  | | 1 |
| 5 |  |  | Degree | | □ | □ |  | | 1 |
| 6 |  |  | Mitigation factor | | □ | □ |  | | 1 |
| 7 |  |  | Aggravating factor | | □ | □ |  | | 1 |
| 8 |  | Characteristic Accompanying symptom1,2,3,4 | Accompanying symptom 1 | | □ | □ |  | | 1 |
| 9 |  | Accompanying symptom 2 | | □ | □ |  | | 1 |
| 10 |  |  | Accompanying symptom 3 | | □ | □ |  | | 0.88 |
| 11 |  |  | Accompanying symptom 4 | | □ | □ |  | | 0.75 |
| 12 |  | History taking to determine ‘Sho’ | Sensitive to heat or cold | | □ | □ |  | | 1 |
| 13 |  | Chill | | □ | □ |  | | 1 |
| 14 |  |  | Influence of weather | | □ | □ |  | | 0.88 |
| 15 |  |  | Menstruation | | □ | □ |  | | 0.88 |
| 16 |  |  | Perspiration | | □ | □ |  | | 1 |
| 17 |  |  | Moods and emotions | | □ | □ |  | | 1 |
| 18 |  |  | Appetite | | □ | □ |  | | 1 |
| 19 |  |  | Bowel movement | | □ | □ |  | | 1 |
| 20 |  |  | Fatigue | | □ | □ |  | | 0.88 |
| 21 |  |  | Sleep | | □ | □ |  | | 1 |
|  |  |  |  | | **He/She implemented** | **He/She implemented,**  **but inappropriately** | **He/She didn't**  **implemente** | |  |
| 22 | **Shi-shin** | Inspection | Complexion | | □ | □ | □ | | 1 |
| 23 | **(Examinations)** |  | Lips | | □ | □ | □ | | 1 |
| 24 |  |  | Skin | | □ | □ | □ | | 1 |
| 25 |  |  | Nail | | □ | □ | □ | | 1 |
| 26 |  | Tongue inspection | Color | | □ | □ | □ | | 1 |
| 27 |  |  | Size | | □ | □ | □ | | 1 |
| 28 |  |  | Tooth mark | | □ | □ | □ | | 1 |
| 29 |  |  | Tongue coating | | □ | □ | □ | | 1 |
| 30 |  |  | Varicosis of the lingual veins | | □ | □ | □ | | 1 |
| 31 |  | Pulse examination | Pulse | | □ | □ | □ | | 0.88 |
| 32 |  | Abdominal examination | Sweating of the abdominal wall | | □ | □ | □ | | 0.63 |
| 33 |  |  | Skin temperature of the abdominal wall | | □ | □ | □ | | 0.88 |
| 34 |  |  | Abdominal strength | | □ | □ | □ | | 1 |
| 35 |  |  | Abdominal muscle tension | | □ | □ | □ | | 0.88 |
| 36 |  |  | Epigastric discomfort and resistance | | □ | □ | □ | | 1 |
| 37 |  |  | Hypochondriac discomfort and distension | | □ | □ | □ | | 1 |
| 38 |  |  | Brisk pulsation in the supra-umbilical region | | □ | □ | □ | | 1 |
| 39 |  |  | Splashing sound in epigastric region fluid retension in stomach | | □ | □ | □ | | 1 |
| 40 |  |  | Weakness of the lower abdominal region | | □ | □ | □ | | 1 |
| 41 |  |  | Para-umblical tenderness and resistance | | □ | □ | □ | | 1 |
|  |  |  |  | | **He/She implemented** | **He/She implemented,**  **but inappropriately** | **He/She didn't**  **implemente** | |  |
| 42 | **Communication** | Appropriate attitude toward patients | | | □ | □ | □ | | 1 |
| 43 |  | An attitude that encourages talking and asking questions | | | □ | □ | □ | | 1 |
| 44 |  | Easy to understand questions | | | □ | □ | □ | | 1 |
| 45 |  | Questions that take into account psychosocial background (mind-body unity) | | | □ | □ | □ | | 1 |
| 46 |  | Summarize patient information and review contents | | | □ | □ | □ | | 0.88 |
| 47 |  | Patient-centered examination | | | □ | □ | □ | | 1 |
| 48 |  | Consideration for the patient's emotions | | | □ | □ | □ | | 1 |
| 49 |  | Provide clear explanations to patients | | | □ | □ | □ | | 1 |
| 50 |  | Smooth execution of medical examination | | | □ | □ | □ | | 0.63 |
|  |  |  | | |  |  |  | |  |  |
|  |  |  | **Total (2 points each)：** | |  |  |  | |  |
