# Supplementary material for: Application of Objective Structured Clinical Examinations (OSCE) for The Evaluation of Kampo Medicine Training
Source: Research Square preprint supplement (doi:10.21203/rs.3.rs-855872/v1), 2021-09-23
Supplement: Supplementary file 4 [file 85df035a1403d5527a2dddd8.docx]

**Competency:**

**1 Overview the concept of ‘SHO’**

**(Yin and Yang, Emptiness and Truth, Cold and Heat, Front and Back, Five Organs, Six Disease Positions)**

**Theoretical concepts of qi, blood, and water**

**2 Outline the kampo diagnosis process ‘Shi-shin’ (inspection (complexion, color, tongue diagnosis), listening, inquiry, and palpation (pulse diagnosis and abdominal diagnosis).**

**Blueprint:**

| **Kampo diagnostic process’Sho’pattern** | | | **General concepts** | | | | | |
| --- | --- | --- | --- | --- | --- | --- | --- | --- |
| **qi** | | | **blood** | | **fruid** |
| **qi deficiency** | **qi stagnation** | **qi counter flow pattern** | **blood deficiency** | **static blood** | **fruid retention** |
| **Shi-shin** | **Inspection** | **Tongue examination** |  | Hangekobokuto (Scenario 2) | Ryokeijutsukanto (Scenario 3) |  | Keishibukuryogan (Scenario1) | Ryokeijutsukanto (Scenario 3) |
| **Listening** |  |
| **Inquiry** |  |
|  |
|  |
|  |
| **Palpation** | **Pulse examination** |
| Abdominal examination |

Ryokeijutsukanto covered both concepts of qi stagnation and fruid retention.

**Basic terms of Kampo medicine:**

| Shishin (four examination) | **the four examinations consist of inspection, listening, inquiry, and palpation** | |
| --- | --- | --- |
| Inspection | **a method of examination collecting clinical information from a patient visually. This includes tongue examination.** | |
| Listening | **a method of examination collecting clinical information from a patient by hearing and smelling** | |
| Inquiry | **a method of examination asking about a patient's history and complaints** | |
| Palpation | **a method of examination collecting clinical data from a patient by touching and pressing the body surface. This includes pulse and abdominal examination** | |
| Sho 'pattern' | **Diagnosis of a patient's signs and symptoms coprehensively based on theories of Kampo medicine.** | |
| qi, blood, fluid | **Physiological factors in the theory of Kampo medicine.** |  |
